# Supplementary material for: Type 2C Protein Phosphatases MoPtc5 and MoPtc7 Are Crucial for Multiple Stress Tolerance, Conidiogenesis and Pathogenesis of Magnaporthe oryzae
Source: MDPI journal article supplement (doi:10.3390/jof9010001), 2022-12-20
Supplement: s1 [file s1]

## PRIMERS USED IN THIS STUDY

### List of primers used to generate mutants and complementation

| Name                                                                    | Sequence (5'-3')                                                                                                                                | Remarks                                                      |
|-------------------------------------------------------------------------|-------------------------------------------------------------------------------------------------------------------------------------------------|--------------------------------------------------------------|
| MGG_00166AF<br>MGG_00166 AR<br>MGG_00166 BF<br>MGG_00166 BR             | GCCAAAATGAGATACCAGAC<br>AGGGAACAAAAGCTGGGTACCCAGAGACGGTTGCAGAGACAC<br>GAATAGAGTAGATGCCGACCGCGGGTTGAGAAACAGCCCCGCATAG<br>TTCAACGACCACGAAAGC      | Primers used to amplify<br>A and B Fragments.<br>(MGG_00166) |
| MGG_00166 OF<br>MGG_00166 OR<br>MGG_00166 UA                            | AAAACCACAGCCACTCCG<br>CGCTTGCTTGTCAAATCG<br>CGGTCGGTGGCGGTAGTGAT                                                                                | Primers used to check to<br>check ORF<br>(MGG_00166)         |
| MGG_03154 AF<br>MGG_03154 AR<br>MGG_03154 BF<br>MGG_03154 BR            | AATCCAATGGTTCCTTCTT<br>TTGACCTCCACTAGCTCCAGCCAAGCCCCGACTACATGAATTGACT<br>GAATAGAGTAGATGCCGACCGCGGGTTATTCCTTATGTCCAGTAATCC<br>GCCTACGATGTTGTTGAG | Primers used to amplify<br>A and B Fragments<br>(MGG_03154)  |
| MGG_03154 OF<br>MGG_03154 OR<br>MGG_03154 UA                            | AGAACGAGCAGTCCTATA<br>CCTACTACTTCCTCATTTGG<br>GCGTGCCCAGTATAGAGC                                                                                | Primers to check ORF of<br>(MGG_03154)                       |
| MGG_00166Com-F<br>MGG_00166 Com-R<br>MGG_03154 Com-F<br>MGG_03154 Com-R | GAACAAAAGCTGGGTGAGAGGAGGCGCGTTTT<br>CTGCAGGCATGCAAGTTGAAGATGTGGCCGGTT<br>GAACAAAAGCTGGGTGTCGCAATACTCGGTCTT<br>CTGCAGGCATGCAAGGACCTTGATATCCTCG   | Primers used for<br>complementation                          |

### A list of quantitative real-time PCR (qRT PCR) primers

| Name                                                                                                                                                         | Sequence (5'-3')                                                                                                                                                                                                                                                                       | Remarks                       |
|--------------------------------------------------------------------------------------------------------------------------------------------------------------|----------------------------------------------------------------------------------------------------------------------------------------------------------------------------------------------------------------------------------------------------------------------------------------|-------------------------------|
| MoPTC1 QF<br>MoPTC1 QR<br>MoPTC2 QF<br>MoPTC2 QR<br>MoPTC5 QF<br>MoPTC5 QR<br>MoPTC6 QF<br>MoPTC6 QR<br>MoPTC7 QF<br>MoPTC7 QR<br>Tubulin 2QF<br>Tubulin 2QR | CATCCCTATACGACCGAAACTG<br>CCGCTGGGTCTTCGATATTT<br>CGACAGAGGACCAGACAAATAA<br>TCACAGCAGCGTCAATGT<br>GATGGAAAGGACAGGTTT<br>GTTACGAACGAGATGAGT<br>TTCATCAGTTACATCAGCAA<br>ACGAAGTAGTTGTGGAAG<br>GCCAAGGAAGTCAAGAAA<br>TTGTCTGTTGCTATTGTCT<br>TCGACAGCAATGGAGTTTAC<br>AGCACCAGACTGACCGAAGAC | qPCR primers for<br>PTC genes |

|                                                                                                                                                                                                                                                                                                                                                                                           |                                                                                                                                                                                                                                                                                                                                                                                                                                        |                                                      |
|-------------------------------------------------------------------------------------------------------------------------------------------------------------------------------------------------------------------------------------------------------------------------------------------------------------------------------------------------------------------------------------------|----------------------------------------------------------------------------------------------------------------------------------------------------------------------------------------------------------------------------------------------------------------------------------------------------------------------------------------------------------------------------------------------------------------------------------------|------------------------------------------------------|
| <b>MoCHS1 QF</b><br><b>MoCHS1 QR</b><br><b>MoCHS2 QF</b><br><b>MoCHS2 QR</b><br><b>MoCHS3 QF</b><br><b>MoCHS3 QR</b><br><b>MoCHS4 QF</b><br><b>MoCHS4 QR</b><br><b>MoCHS5 QF</b><br><b>MoCHS5 QR</b><br><b>MoCHS6 QF</b><br><b>MoCHS6 QR</b><br><b>MoCHS7 QR</b>                                                                                                                          | <b>AGTGCGTTCCGGATACGTTAG</b><br><b>TGGTCACCGTGGAAGTATTG</b><br><b>CGGTCCTCTTAGCCAGTATTTTC</b><br><b>TACGATCCTCAGCCAGATACA</b><br><b>CAACGAGGACGAGGTTCTTT</b><br><b>TCTTCTTCCATGCCTCCTTTC</b><br><b>GAAGAGCTACGCGACAAGAA</b><br><b>CTCGAAGCATTAGCGATTG</b><br><b>GACTCTTGTTGGCGGTCTTTA</b><br><b>CATCCCGGATACGAGCTAATTG</b><br><b>CTTCGCTGGTGAGGTTGAATA</b><br><b>GCCTACGATGTTGTTGAG</b><br><b>TTCAACGACCACGAAAGC</b>                   | qPCR primers for chitin synthase encoding genes.     |
| <b>MGG_00184(MoHTFI) QF:</b><br><b>MGG_00184(MoHTFI)QR:</b><br><b>MGG_00513(MoCON8) QF:</b><br><b>MGG_00513(MoCON8) QR</b><br><b>MGG_05287(MoCON7) QF:</b><br><b>MGG_05287(MoCON7) QR:</b><br><b>MGG_02246(MoCON6) QF:</b><br><b>MGG_02246(MoCON6) QR:</b><br><b>MGG_01215(MoCOM1) QF:</b><br><b>MGG_01215(MoCOM1) QR</b><br><b>MGG_14517(MoflbA) QF:</b><br><b>MGG_14517(MoflbA) QR:</b> | <b>5' AAATGTTATGACGAAAGAG 3'</b><br><b>5' TTGTGTTGAAAGTTGAAG 3'</b><br><b>5' ACCTCTTCCTCTTCTTCG 3'</b><br><b>5' TTGGTCTGTTTCGAGTGAT 3'</b><br><b>5' CGATACGAAGAAATTGAG 3'</b><br><b>5' GGATCTCCTTAAACTCTT 3'</b><br><b>5' AAGCAGCACTCGAAGAAGGT 3'</b><br><b>5' ACATCGCCGCCATCAAAC 3'</b><br><b>5' AACCAATGCTTCCGATAT 3'</b><br><b>5' TGAGTCGTTGTAGTATGC 3'</b><br><b>5' ACAACCTTACAACGATAC 3'</b><br><b>5' TAACATGCTAACAATTAACG 3'</b> | qPCR primers for conidiation related encoding genes. |
| <b>MGG_03154Probe AF:</b><br><b>MGG_03154Probe AR:</b><br><b>MGG_00166 Probe AF</b><br><b>MGG_00166 Probe AR</b>                                                                                                                                                                                                                                                                          | <b>5'AATCCAATGGTTCCTTCTT 3'</b><br><b>5'CCGACTACATGAATTGACT 3'</b><br><b>5'CGGAGTTGGTGTTAATACT 3'</b><br><b>5'CGATAGGTGACGAAAGATGT 3'</b>                                                                                                                                                                                                                                                                                              | Primers used to amplify Probe sequences              |
